# Supplementary material for: Predictors of increase in chronicity index and of kidney function impairment at repeat biopsy in lupus nephritis
Source: PubMed Central journal article supplement — Lupus Sci Med. 2022 Aug 16;9(1):e000721. doi: 10.1136/lupus-2022-000721 (PMC9386217; doi:10.1136/lupus-2022-000721), 2022-08-16
Supplement: lupus-2022-000721supp001.pdf [file lupus-2022-000721supp001.pdf]

### **Legend of supplemental material**

**Supplementary table 1:** Components of activity and chronicity indices at 1st and 2nd kidney biopsy in all patients and in those who received a 2nd kidney biopsy for proteinuric flare, nephritic flare or protocol biopsy.

**Supplementary table 2:** Histological transformation of lupus nephritis classes between the first and second kidney biopsy

**Supplementary table 3:** Clinical and histological data at first and second kidney biopsy of patients who developed and of those who did not develop kidney function impairment (KFI).

**Supplementary table 4:** Clinical and histological predictors of kidney function impairment (KFI) within five years after the second kidney biopsy. Univariate and multivariate analysis.

**Supplementary table 5:** Combination of the different risk factors that contributed to the study end-points.

**Supplementary table 1: Components of activity and chronicity indices at 1st and 2nd kidney biopsy in all patients and in those who received a 2nd kidney biopsy for proteinuric flare, nephritic flare or protocol biopsy.**

| Variables                 | Overall pts (n=61)    |                       | Proteinuric flare (n=22) |            | Nephritic flare (n=25) |                       | Protocol biopsy (n=14) |          |
|---------------------------|-----------------------|-----------------------|--------------------------|------------|------------------------|-----------------------|------------------------|----------|
| <b>Activity index</b>     |                       |                       |                          |            |                        |                       |                        |          |
| Endocap. Hypercell, >0    | 58 (95%)              | 38 (62%)              | 20 (91%)                 | 13 (59%)   | 24 (96%)               | 20 (80%)              | 14 (100%)              | 5 (36%)  |
| Neutr infiltr/karyor, >0  | 52 (85%)              | 34 (56%)              | 16 (73%)                 | 12 (54.5%) | 23 (92%)               | 20 (80%)              | 13 (93%)               | 2 (14%)  |
| Hyaline deposits, >0      | 50 (83%) <sup>o</sup> | 24 (39%)              | 18 (82%)                 | 9 (41%)    | 21 (84%)               | 15 (60%)              | 11 (85%) <sup>o</sup>  | -        |
| Cell/fibrocell cresc, >0  | 37 (62%) <sup>o</sup> | 21 (34%)              | 11 (53%) <sup>o</sup>    | 6 (27%)    | 17 (68%)               | 13 (52%)              | 9 (64%)                | 2 (14%)  |
| Fibr necr >0              | 29 (47.5%)            | 16 (26%)              | 10 (45.5%)               | 5 (23%)    | 13 (52%)               | 10 (40%)              | 6 (43%)                | 1 (7%)   |
| Interstitial inflam, >0   | 27 (44%)              | 24 (39%)              | 8 (36%)                  | 6 (27%)    | 10 (40%)               | 15 (60%)              | 9 (64%)                | 3 (21%)  |
| <b>Chronicity index</b>   |                       |                       |                          |            |                        |                       |                        |          |
| Glomerular sclerosis, >0  | 25 (41%)              | 48 (79%)              | 7 (32%)                  | 17 (77%)   | 8 (32%)                | 20 (80%)              | 10 (71%)               | 11 (78%) |
| Fibrous crescents, >0     | 27 (44%) <sup>o</sup> | 31 (51%)              | 10 (45.5%)               | 13 (59%)   | 12 (48%)               | 14 (56%)              | 5 (36%)                | (36%)    |
| Tubular atrophy, >0       | 10 (16%)              | 38 (63%) <sup>o</sup> | 4 (18%)                  | 11 (50%)   | 2 (8%)                 | 16 (67%) <sup>o</sup> | 4 (28.5%)              | 11 (78%) |
| Interstitial fibrosis, >0 | 21 (34%)              | 48 (79%)              | 8 (36%)                  | 14 (64%)   | 5 (20%)                | 22 (88%)              | 8 (57%)                | 12 (86%) |

<sup>o</sup> 1 data missing

Legend: Endocap. Hypercell, Endocapillary hypercellularity; Neutr infiltr/karyor, Neutrophils infiltration/karyorrhexis; Cell/fibrocell cresc, Cellular/fibrocellular crescents; Fibr necr, Fibrinoid necrosis; Interstitial inflam, Interstitial inflammation

**Supplementary table 2: Histological transformation of lupus nephritis classes between the first and second kidney biopsy**

| Histological classes at 1st kidney biopsy | Histological classes at 2nd kidney biopsy |            |              |             |           |                |
|-------------------------------------------|-------------------------------------------|------------|--------------|-------------|-----------|----------------|
|                                           | I (1 pts)                                 | II (6 pts) | III (12 pts) | IV (36 pts) | V (6 pts) | Transformation |
| III = 7 pts                               |                                           | 1 (14%)    | 3 (43%)      | 3 (43%)     |           | 57 %           |
| IV = 47 pts                               | 1 (2%)                                    | 5 (10%)    | 6 (13%)      | 31 (66%)    | 4 (9%)    | 34%            |
| V = 7 pts                                 |                                           |            | 3 (43%)      | 2 (28.5%)   | 2 (28.5%) | 71.5%          |
| Tot 61 pts                                |                                           |            |              |             |           | 47%            |

**Supplementary table 3: Clinical and histological data at first and second kidney biopsy of patients who developed and of those who did not develop kidney function impairment (KFI).**

|                                                     | <b>KFI<br/>(n=25)</b> | <b>NO KFI<br/>(n=33)</b> | <b>P</b>     |
|-----------------------------------------------------|-----------------------|--------------------------|--------------|
| <b>Clinical data at first kidney biopsy</b>         |                       |                          |              |
| Serum Creatinine (mg/dl)                            | 1.1 [0.7-1.6]         | 1.2 [0.9-1.6]            | 0.718        |
| eGFR (ml/min/1.73m <sup>2</sup> )                   | 67 [43-120]           | 58 [45-86]               | 0.144        |
| Proteinuria > 3.5 g/die, n° of pts (%)              | 13 (52%)              | 14 (42%)                 | 0.469        |
| Arterial hypertension, n° of pts (%)                | 10 (40%)              | 22 (67%)                 | 0.043        |
| <b>Histological data at first kidney biopsy</b>     |                       |                          |              |
| <b>Activity index</b>                               | 7 [4.5-9]             | 7 [5.5-10]               | 0.402        |
| Endocapillary hypercellularity** >1, pts (%)        | 15 (60%)              | 18 (54.5)                | 0.677        |
| Neutrophils infiltration/karyorrhexis** >1, pts (%) | 12 (48%)              | 17 (51.5%)               | 0.790        |
| Cellular/fibrocellular crescents** >1, pts (%)      | 6 (24%)               | 3 (9%)                   | 0.120        |
| Hyaline deposits/wire loops **>1, pts (%)           | 14 (56%)              | 21 (63.6%)               | 0.556        |
| Fibrinoid necrosis** >1, pts (%)                    | 5 (20%)               | 11 (33%)                 | 0.260        |
| Interstitial inflammation** >1, pts(%)              | 3 (12%)               | 6 (18%)                  | 0.519        |
| <b>Chronicity index</b>                             | 1 [1-3]               | 2 [0-3]                  | 0.646        |
| Glomerular sclerosis** >1, pts (%)                  | 3 (12%)               | 3 (9%)                   | 0.718        |
| Fibrous crescents** >1, pts (%)                     | 2 (8%)                | 1 (3%)                   | 0.397        |
| Tubular atrophy** >1, pts (%)                       | 1 (4%)                | 1 (3%)                   | 0.841        |
| Interstitial fibrosis** >1, pts (%)                 | 3 (12%)               | 1 (3%)                   | 0.181        |
| <b>Clinical data at second kidney biopsy</b>        |                       |                          |              |
| Serum Creatinine (mg/dl)                            | 1.4 [1-2.2]           | 1 [0.9-1.2]              | <b>0.007</b> |
| eGFR (ml/min/1.73m <sup>2</sup> )                   | 49 [32-67]            | 75 [56-97]               | <b>0.023</b> |
| Proteinuria > 3.5 g/die                             | 14 (56%)              | 7 (21%)                  | <b>0.006</b> |
| Arterial hypertension, n° of pts (%)                | 17 (68%)              | 14 (42%)                 | <b>0.053</b> |
| Nephritic syndrome                                  | 16 (64%)              | 7 (21%)                  | <b>0.001</b> |
| <b>Histological data at second kidney biopsy</b>    |                       |                          |              |
| <b>Activity index</b>                               | 4 [2.5 – 6.5]         | 1 [1-5]                  | <b>0.032</b> |
| Endocapillary hypercellularity** >1, pts (%)        | 15 (60%)              | 18 (54.5)                | 0.678        |
| Neutrophils infiltration/karyorrhexis** >1, pts (%) | 12 (48%)              | 17 (51.5%)               | 0.791        |
| Cellular/fibrocellular crescents** >1, pts (%)      | 6 (24%)               | 3 (9%)                   | 0.120        |
| Hyaline deposits/wire loops** >1, pts (%)           | 14 (56%)              | 21 (63.6%)               | 0.556        |
| Fibrinoid necrosis** >1, pts (%)                    | 5 (20%)               | 11 (33%)                 | 0.260        |
| Interstitial inflammation** >1, pts(%)              | 3 (12%)               | 6 (18%)                  | 0.519        |
| <b>Chronicity index</b>                             | 5 [2-7]               | 4 [2-5]                  | <b>0.027</b> |
| Glomerular sclerosis** >1, pts (%)                  | 9 (36%)               | 5 (15%)                  | 0.066        |
| Fibrous crescents** >1, pts (%)                     | 6 (24%)               | 4 (12%)                  | 0.235        |
| Tubular atrophy** >1, pts (%)                       | 8 (32%)               | 5 (15%)                  | 0.127        |
| Interstitial fibrosis** >1, pts (%)                 | 10 (40%)              | 6 (18%)                  | 0.065        |

P values are evaluated with t-test for independent samples and with Chi-square test between qualitative or dichotomized variables.

(Data of three patients are missing)

\*\* These variables were categorized as: 0+1 vs 2+3, being: 0 if absent; 1+ if mild (in less than 25% of glomeruli and/or in tubulointerstitial cortex); 2+ if moderate (in between 25% and less than 50% of glomeruli and/or in tubulointerstitial cortex), and , 3+ if severe (in more than 50% of glomeruli and/or in tubulointerstitial cortex).

**Supplementary Table 4: Clinical and histological predictors of kidney function impairment (KFI) within five years after the second kidney biopsy. Univariate and multivariate analysis.**

|                                                      | Univariate analysis |               |       | Multivariate analysis |               |       |
|------------------------------------------------------|---------------------|---------------|-------|-----------------------|---------------|-------|
|                                                      | OR                  | CI            | P     | OR                    | CI            | P     |
| <b>Clinical features at first kidney biopsy</b>      |                     |               |       |                       |               |       |
| Proteinuria >3.5 g/die                               | 3.677               | 0.995-13.588  | 0.051 |                       |               |       |
| <b>Histological features at first kidney biopsy</b>  |                     |               |       |                       |               |       |
| Cellular/fibrocellular crescents >1**                | 8.212               | 2.707-24.909  | 0.000 |                       |               |       |
| <b>Clinical features at second kidney biopsy</b>     |                     |               |       |                       |               |       |
| Serum creatinine                                     | 2.387               | 1.719-3.316   | 0.000 |                       |               |       |
| Proteinuria >3.5 g/die                               | 3.070               | 1.004-9.390   | 0.049 |                       |               |       |
| <b>Histological features at second kidney biopsy</b> |                     |               |       |                       |               |       |
| <b>Cell/fibrocell crescents&gt;1**</b>               | 10.577              | 2.836-39.444  | 0.000 | 31.955                | 5.160-197.910 | 0.000 |
| Interstitial inflammation>1**                        | 3.695               | 1.128-12.108  | 0.031 |                       |               |       |
| <b>Chronicity Index &gt;4</b>                        | 23.698              | 3.075-182.613 | 0.001 | 39.078                | 4.375-349.071 | 0.001 |
| Fibrous crescents>1**                                | 5.602               | 1.873-16.754  | 0.002 |                       |               |       |
| Interstitial fibrosis>1**                            | 6.545               | 2.129-20.118  | 0.026 |                       |               |       |
| Tubular atrophy>1**                                  | 6.626               | 2.214-19.832  | 0.001 |                       |               |       |

\*\*These variables were categorized as: 0+1 vs 2+3, being: 0 if absent; 1+ if mild (in less than 25% of glomeruli and/or in tubulointerstitial cortex); 2+ if moderate (in between 25% and less than 50% of glomeruli and/or in tubulointerstitial cortex), and , 3+ if severe (in more than 50% of glomeruli and/or in tubulointerstitial cortex).

**Supplementary Table 5: Combination of the different risk factors that contributed to the study end-points.**

| <b><u>Chronicity indices increase from first to second biopsy.</u></b>                                                                                                             | <b><u>Long-term kidney function impairment.</u></b>                                                                                                                                                                                                                                                                                  |
|------------------------------------------------------------------------------------------------------------------------------------------------------------------------------------|--------------------------------------------------------------------------------------------------------------------------------------------------------------------------------------------------------------------------------------------------------------------------------------------------------------------------------------|
| <b>Clinical /therapeutical predictors</b>                                                                                                                                          | <b>Clinical and histological predictors</b>                                                                                                                                                                                                                                                                                          |
| <b>At first kidney biopsy</b><br>Serum creatinine $\geq 1.6$ mg/dl<br><br>Presentation with nephritic syndrome<br>Cyclophosphamide tends to protect from chronicity index increase | <b>At first kidney biopsy</b><br>Moderate/severe cellular/fibrocellular crescents                                                                                                                                                                                                                                                    |
| <b>Time dependent factors</b><br>Renal flares and in particular nephritic flares                                                                                                   | <b>At second kidney biopsy</b><br>Serum creatinine<br>Nephrotic proteinuria<br>Arterial hypertension<br>Activity index $\geq 3$<br>- Moderate/severe cellular/fibrocellular crescents<br>- Moderate/severe hyaline deposits<br>Chronicity index >4<br>- Moderate/severe fibrous crescents<br>- Moderate/severe interstitial fibrosis |
